# Supplementary material for: Optically biaxial interdigitated smectic A phase: liquid crystalline dimeric bidentate ligands and their metal complexes
Source: Royal Society of Chemistry journal article supplement (doi:10.1039/b717123d), 2008-01-01
Supplement: b717123d.pdf [file b717123d.pdf]

## Electronic Supporting Information (ESI)

### Optically biaxial interdigitated smectic A phase : liquid crystalline dimeric bidentate ligands and their metal complexes

Channabasaveshwar V. Yelamaggad,\* Indudhara Swamy Shashikala,  
V.Padmini Tamilenth, D. S. Shankar Rao, Geetha G. Nair and Subbarao Krishna Prasad

*Centre for Liquid Crystal Research, Jalahalli, Bangalore 560013, India.*

#### General Information

The solvents (methanol, ethanol, acetonitrile and benzene) used for the reactions were distilled and dried according to standard procedures. The metal salts viz., palladium (II) chloride and copper (II) acetate monohydrate obtained from Aldrich, were used without any further purification. All the ligands<sup>11</sup> and the metal-complexes were purified by recrystallization choosing appropriate mixture of solvents; while the intermediates, depending upon the need, were purified by both column chromatographic and recrystallization techniques. Chromatography was performed using either silica gel (60-120, 100-200 and 230-400 mesh) or neutral aluminium oxide. For thin layer chromatography, aluminium sheets pre-coated with silica gel (Merck, Kieselgel60, F<sub>254</sub>) were employed. Infrared spectra were recorded on a Perkin-Elmer Spectrum 1000 FTIR spectrometer; the spectral positions (absorption maxima) are given in wave numbers (cm<sup>-1</sup>). <sup>1</sup>H NMR spectra were recorded using Bruker AMX-400 (400 MHz) spectrometer. For <sup>1</sup>H NMR spectra, the chemical shifts are reported in ppm relative to SiMe<sub>4</sub> (TMS) as an internal standard and coupling constants are presented in Hz. Elemental analysis were performed using a Eurovector model EA3000 CHNS elemental analyzer. Mass spectra were determined on a JOEL JMS-600H spectrometer in FAB<sup>+</sup> mode using 3-nitrobenzyl alcohol as a liquid matrix. The initial phase transitions and corresponding temperatures for the complexes were determined by a polarizing optical microscope (POM) (Leitz DMRXP or Leica DMLP) equipped with a Mettler FP82HT hot stage controlled by a Mettler FP90 central processor. Initially, the optical textural observations were performed using untreated clean glass slides; for confirmation of mesophases two differently surface-coated slides, one treated for planar alignment, the other for

homeotropic alignment were used. The phase transition temperatures and associated enthalpies were determined from thermograms recorded at a scanning rate of 5 °C/min on a differential scanning calorimeter (Perkin Elmer DSC-7) calibrated using pure indium as a standard. X-Ray diffraction studies were carried on both aligned and powder samples filled in Lindemann capillaries. These experiments were performed using CuK $\alpha$  radiations ( $\lambda = 1.5418 \text{ \AA}$ ) from a fine focus sealed-tube generator (Enraf Nonius FR590), in conjunction with Image plate setup.

### Structural characterization of copper complexes

**DCu-7:** A brown solid; IR (KBr pellet):  $\nu_{\max}$  in  $\text{cm}^{-1}$  2925, 2858, 2225, 1605, 1436 and 1176; MS (FAB<sup>+</sup>):  $m/z$  for C<sub>86</sub>H<sub>103</sub>N<sub>4</sub>O<sub>6</sub>Cu (M+1), Calculated: 1350.3, Found: 1351.5. Anal. calc for C<sub>86</sub>H<sub>102</sub>N<sub>4</sub>O<sub>6</sub>Cu; C, 76.44; H, 7.61; N, 4.15. Found: C, 76.78; H, 7.31; N, 4.14.

**DCu-8:** A brown solid; IR (KBr pellet):  $\nu_{\max}$  in  $\text{cm}^{-1}$  2923, 2852, 2225, 1604, 1436 and 1176; Anal. calc for C<sub>88</sub>H<sub>106</sub>N<sub>4</sub>O<sub>6</sub>Cu; C, 76.63; H, 7.75; N, 4.06. Found: C, 76.35; H, 8.07; N, 3.95.

**DCu-9:** A brown solid; IR (KBr pellet):  $\nu_{\max}$  in  $\text{cm}^{-1}$  2923, 2852, 2225, 1604, 1436 and 1176; Anal. calc for C<sub>90</sub>H<sub>110</sub>N<sub>4</sub>O<sub>6</sub>Cu; C, 76.81; H, 7.88; N, 3.98. Found: C, 76.78; H, 7.31; N, 4.0.

**DCu-10:** A brown solid; IR (KBr pellet):  $\nu_{\max}$  in  $\text{cm}^{-1}$  2924, 2852, 2226, 1603, 1436 and 1175; Anal. calc for C<sub>92</sub>H<sub>114</sub>N<sub>4</sub>O<sub>6</sub>Cu, C, 76.98; H, 8.0; N, 3.90. Found: C, 76.93; H, 7.36; N, 4.01.

### Structural characterization of palladium complexes

**DPd-7:** A yellow solid; IR (KBr pellet):  $\nu_{\max}$  in  $\text{cm}^{-1}$  2920, 2852, 2224, 1604, 1423 and 1198; <sup>1</sup>H NMR (400 MHz, CDCl<sub>3</sub>):  $\delta$  7.68 (d,  $J = 8.0 \text{ Hz}$ , 4H, Ar), 7.63 (d,  $J = 8.3 \text{ Hz}$ , 4H, Ar), 7.56 (s, 2H, CH=N), 7.53 (d,  $J = 8.5 \text{ Hz}$ , 4H, Ar), 7.21 (d,  $J = 8.4 \text{ Hz}$ , 4H, Ar), 7.18 (d,  $J = 8.3 \text{ Hz}$ , 4H, Ar), 7.01 (d,  $J = 7.9 \text{ Hz}$ , 2H, Ar), 6.99 (d,  $J = 8.1 \text{ Hz}$ , 4H, Ar), 6.12 (dd,  $J = 8.7, J = 1.7 \text{ Hz}$ , 2H, Ar), 5.5 (d,  $J = 1.7 \text{ Hz}$ , 2H, Ar), 4.00 (t,  $J = 6.5 \text{ Hz}$ , 4H, 2 × OCH<sub>2</sub>),

3.77(t,  $J = 6.5$  Hz, 4H,  $2 \times \text{CH}_2$ ), 2.6 (t,  $J = 7.7$  Hz, 4H,  $2 \times \text{Ar-CH}_2$ ), 1.83-1.26 (m, 52H,  $26 \times \text{CH}_2$ ), and 0.87 (t,  $J = 6.6$  Hz, 6H,  $2 \times \text{CH}_3$ ); MS (FAB<sup>+</sup>):  $m/z$  for  $\text{C}_{86}\text{H}_{102}\text{N}_4\text{O}_6\text{Pd}$ ; Calculated: 1392.6, Found: 1392.8. Anal. calc for  $\text{C}_{86}\text{H}_{102}\text{N}_4\text{O}_6\text{Pd}$ ; C, 74.09; H, 7.37; N, 4.02. Found: C, 74.53; H, 7.1; N, 3.88.

**DPd-8:** A yellow solid; IR (KBr pellet):  $\nu_{\text{max}}$  in  $\text{cm}^{-1}$  2924, 2852, 2224, 1605, 1423 and 1198; <sup>1</sup>H NMR (400 MHz,  $\text{CDCl}_3$ ):  $\delta$  7.68 (d,  $J = 8.2$  Hz, 4H, Ar), 7.63 (d,  $J = 8.3$  Hz, 4H, Ar), 7.56 (s, 2H, CH=N), 7.53 (d,  $J = 8.5$  Hz, 4H, Ar), 7.21 (d,  $J = 8.4$  Hz, 4H, Ar), 7.18 (d,  $J = 8.3$  Hz, 4H, Ar), 7.01 (d,  $J = 7.9$  Hz, 2H, Ar), 6.99 (d,  $J = 8.1$  Hz, 4H, Ar), 6.12(dd,  $J = 8.7, J = 1.7$  Hz, 2H, Ar), 5.5(d,  $J = 1.7$  Hz, 2H, Ar), 4.00(t,  $J = 6.5$  Hz, 4H,  $2 \times \text{OCH}_2$ ), 3.8 (t,  $J = 6.3$  Hz, 4H,  $2 \times \text{CH}_2$ ), 2.6 (t,  $J = 7.7$  Hz, 4H,  $2 \times \text{Ar-CH}_2$ ), 1.83-1.26 (m, 56H,  $28 \times \text{CH}_2$ ), and 0.87 (t,  $J = 6.6$  Hz, 6H,  $2 \times \text{CH}_3$ ); MS (FAB<sup>+</sup>):  $m/z$  for  $\text{C}_{88}\text{H}_{106}\text{N}_4\text{O}_6\text{Pd}$ ; Calculated: 1420.9, Found: 1421.1. Anal. calc for  $\text{C}_{88}\text{H}_{106}\text{N}_4\text{O}_6\text{Pd}$ ; C, 74.32; H, 7.51; N, 3.94. Found: C, 74.67; H, 7.11; N, 3.89.

**DPd-9:** A yellow solid; IR (KBr pellet):  $\nu_{\text{max}}$  in  $\text{cm}^{-1}$  2924, 2852, 2224, 1605, 1423 and 1198; <sup>1</sup>H NMR (400 MHz,  $\text{CDCl}_3$ ):  $\delta$  7.68 (d,  $J = 8.4$  Hz, 4H, Ar), 7.63 (d,  $J = 8.0$  Hz, 4H, Ar), 7.56 (s, 2H, CH=N), 7.53 (d,  $J = 8.0$  Hz, 4H, Ar), 7.21 (d,  $J = 8.0$  Hz, 4H, Ar), 7.18 (d,  $J = 8.4$  Hz, 4H, Ar), 7.01 (d,  $J = 8.0$  Hz, 2H, Ar), 6.99 (d,  $J = 8.0$  Hz, 4H, Ar), 6.12(dd,  $J = 8.3, J = 1.7$  Hz, 2H, Ar), 5.5 (d,  $J = 1.7$  Hz, 2H, Ar), 4.00(t,  $J = 6.5$  Hz, 4H,  $2 \times \text{OCH}_2$ ), 3.8 (t,  $J = 6.3$  Hz, 4H,  $2 \times \text{CH}_2$ ), 2.6 (t,  $J = 7.7$  Hz, 4H,  $2 \times \text{Ar-CH}_2$ ), 1.83-1.26 (m, 60H,  $28 \times \text{CH}_2$ ), and 0.87 (t,  $J = 6.6$  Hz, 6H,  $2 \times \text{CH}_3$ ); Anal. calc for  $\text{C}_{90}\text{H}_{110}\text{N}_4\text{O}_6\text{Pd}$ ; C, 74.53; H, 7.64; N, 3.86. Found: C, 74.22; H, 7.84; N, 3.84.

**DPd-10:** A yellow solid; IR (KBr pellet):  $\nu_{\text{max}}$  in  $\text{cm}^{-1}$  2920, 2851, 2226, 1605, 1423 and 1195; <sup>1</sup>H NMR (400 MHz,  $\text{CDCl}_3$ ):  $\delta$  7.68 (d,  $J = 8.4$  Hz, 4H, Ar), 7.63 (d,  $J = 8.0$  Hz, 4H, Ar), 7.56 (s, 2H, CH=N), 7.54 (d,  $J = 8.4$  Hz, 4H, Ar), 7.21 (d,  $J = 8.4$  Hz, 4H, Ar), 7.18 (d,  $J = 8.3$  Hz, 4H, Ar), 7.01 (d,  $J = 7.9$  Hz, 2H, Ar), 6.99 (d,  $J = 8.1$  Hz, 4H, Ar), 6.12(dd,  $J = 8.7, J = 1.7$  Hz, 2H, Ar), 5.5 (d,  $J = 1.7$  Hz, 2H, Ar), 4.00(t,  $J = 6.8$  Hz, 4H,  $2 \times \text{OCH}_2$ ), 3.8 (t,  $J = 6.3$  Hz, 4H,  $2 \times \text{CH}_2$ ), 2.6 (t,  $J = 7.7$  Hz, 4H,  $2 \times \text{Ar-CH}_2$ ), 1.83-1.26 (m, 64H,  $32 \times \text{CH}_2$ ), and 0.87 (t,  $J = 6.6$  Hz, 6H,  $2 \times \text{CH}_3$ ); Anal. calc for  $\text{C}_{92}\text{H}_{114}\text{N}_4\text{O}_6\text{Pd}$ ; C, 74.75; H, 7.77; N, 3.79. Found: C, 74.94; H, 7.14; N, 3.9.

**Table S1:** Electronic absorption spectral data obtained for the micromolar solutions (in CH<sub>2</sub>Cl<sub>2</sub>) of dimeric bidentate ligands and their Cu(II) and Pd(II) complexes

| Compounds     | $\lambda$ (nm) | $\epsilon$<br>(LMol <sup>-1</sup> cm <sup>-1</sup> ) | $\lambda$ (nm) | $\epsilon$<br>(LM <sup>-1</sup> cm <sup>-1</sup> ) |
|---------------|----------------|------------------------------------------------------|----------------|----------------------------------------------------|
| <b>DL-5</b>   | 296.2          | 4705.3                                               | 345.5          | 2777.4                                             |
| <b>DL-6</b>   | 296.2          | 3834.2                                               | 345.5          | 2148.2                                             |
| <b>DL-7</b>   | 296.2          | 1348.2                                               | 345.5          | 811.70                                             |
| <b>DL-8</b>   | 296.2          | 2286.6                                               | 345.5          | 1287.9                                             |
| <b>DL-9</b>   | 296.2          | 4512.1                                               | 345.5          | 2557.2                                             |
| <b>DL-10</b>  | 296.2          | 4208.8                                               | 345.5          | 2215.7                                             |
|               |                |                                                      |                |                                                    |
| <b>DCu-6</b>  | 303.4          | 10941.5                                              | 366.6          | 4683.9                                             |
| <b>DCu-7</b>  | 303.4          | 16098.9                                              | 366.6          | 6585.4                                             |
| <b>DCu-8</b>  | 303.4          | 18712.6                                              | 366.6          | 6286.7                                             |
| <b>DCu-9</b>  | 303.4          | 15244.1                                              | 366.6          | 4824.7                                             |
| <b>DCu-10</b> | 303.4          | 17139.6                                              | 366.6          | 6818.2                                             |
|               |                |                                                      |                |                                                    |
| <b>DPd-6</b>  | 302.4          | 15999.3                                              | 402.6          | 2960.3                                             |
| <b>DPd-7</b>  | 302.4          | 13780.8                                              | 402.6          | 2853.4                                             |
| <b>DPd-8</b>  | 302.4          | 14042.3                                              | 402.6          | 2890.0                                             |
| <b>DPd-9</b>  | 302.4          | 15366.6                                              | 402.6          | 2899.2                                             |
| <b>DPd-10</b> | 302.4          | 16052.3                                              | 402.6          | 2881.4                                             |

The absorption band occurring in the region of 367-403 nm for the metal complexes can be ascribed to *d-d* transition that supports their square planar geometry: see for example, (a) N.Raman, V.Muthuraj, S.Ravichandran and A.Kulandaisamy, *Pro. Indian Acad. Sci. (Chem.Sci)*, **2003**, *115*, 161. (b) A. H. Al-Kubaisi, *Bull. Korean Chem.Soc.*, 2004, **25**, 37. (c) N. Raman, J. Dhavethu Raja and A. Shakthivel, *J.Chem.*, 2007, **119**,303. (d) M. Tuncel, A. Ozbulbul and S. Serin, *Reac. Funct. Polym.* 2008, **68**,292. (e) H. Furuta, H. Maeda and A. Osuka, *Inorg. Chem. Commun.* 2003, **6**, 162. (f) B. Bilgin-Eran, C. Yorur and S. Uzman, *J. Orgmet. Chem.* 2002,**655**,105.

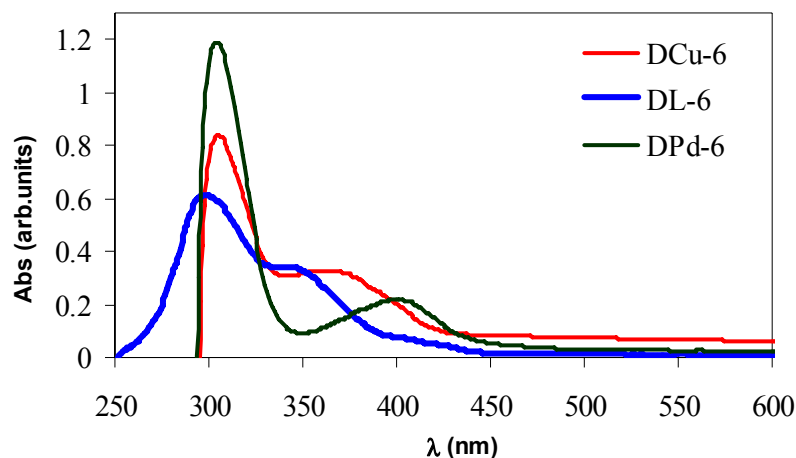

**Figure S1:** Electronic absorption spectra of ligand **DL-6** and its Cu(II) and Pd(II) complexes in CH<sub>2</sub>Cl<sub>2</sub>

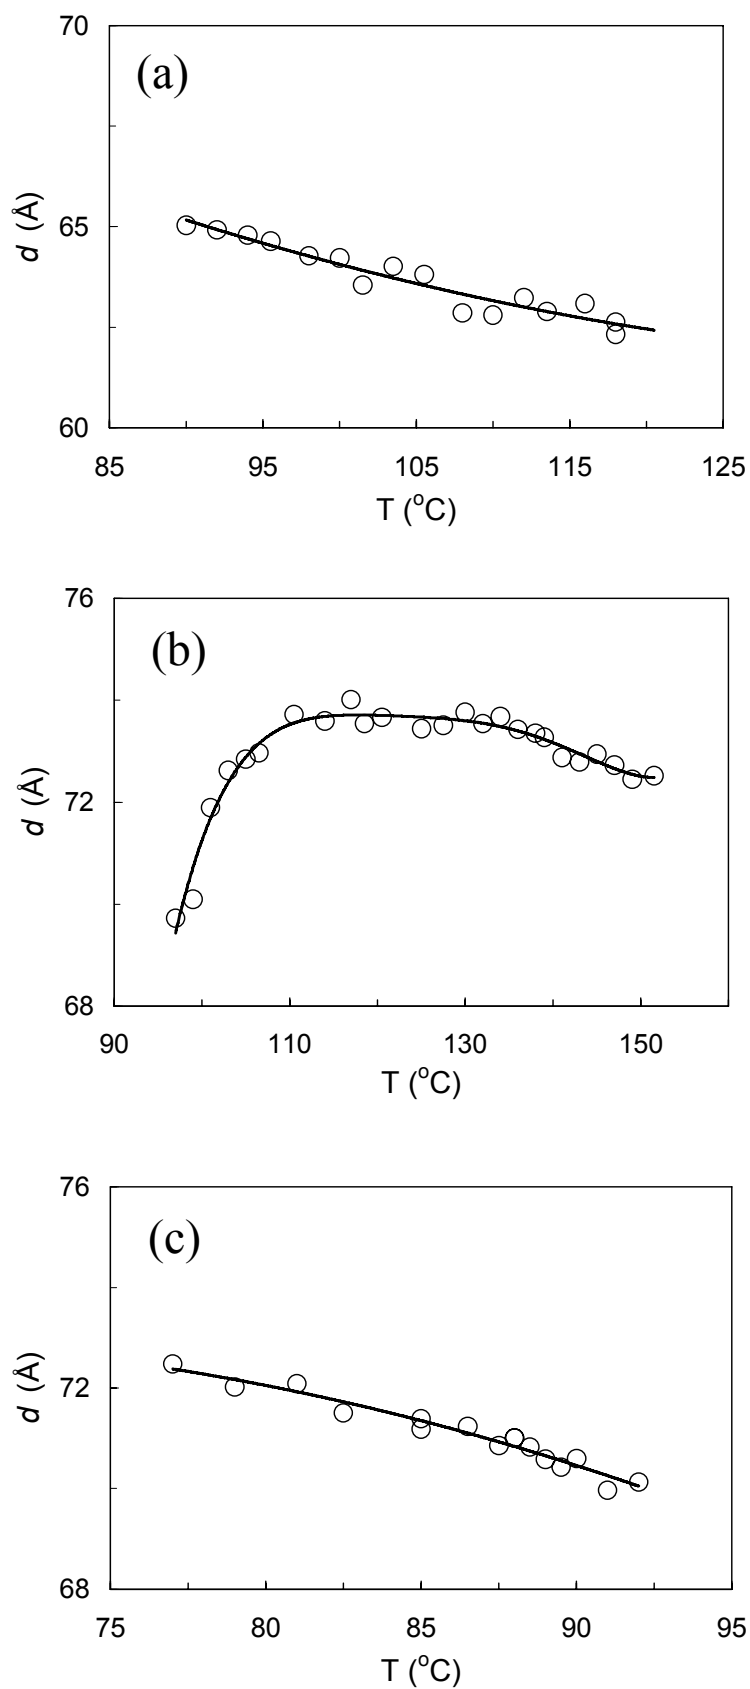

**Figure S2:** The layer spacing ( $d$ ) as a function of temperature obtained in the smectic phases on cooling through the I-N phases for dimers (a) **DL-5**, (b) **DL-6** and (c) **DL-7**

**Table S2:** Estimated molecular lengths ( $l/\text{Å}$ ), layer spacings ( $d/\text{Å}$ ),  $d/l$  ratio and structural assignment of the smectic phases of dimers.

| Dimer<br>( $l/\text{Å}$ ) | Temperature /°C | $d/\text{Å}$ | $d/l$ | Mesophase         |
|---------------------------|-----------------|--------------|-------|-------------------|
| <b>DL-5</b><br>(40.1)     | 118             | 62.6         | 1.56  | SmA <sub>d</sub>  |
|                           | 95.5            | 64.8         | 1.62  | SmA <sub>db</sub> |
| <b>DL-6</b><br>(41.3)     | 151.5           | 72.5         | 1.76  | SmA <sub>d</sub>  |
|                           | 99              | 70.1         | 1.68  | SmC <sub>a</sub>  |
| <b>DL-7</b><br>(42.7)     | 90              | 70.6         | 1.65  | SmA <sub>d</sub>  |
|                           | 82.5            | 71.5         | 1.67  | SmA <sub>db</sub> |
| <b>DL-10</b><br>(46.1)    | 110             | 23.6         | 0.5   | SmA <sub>c</sub>  |

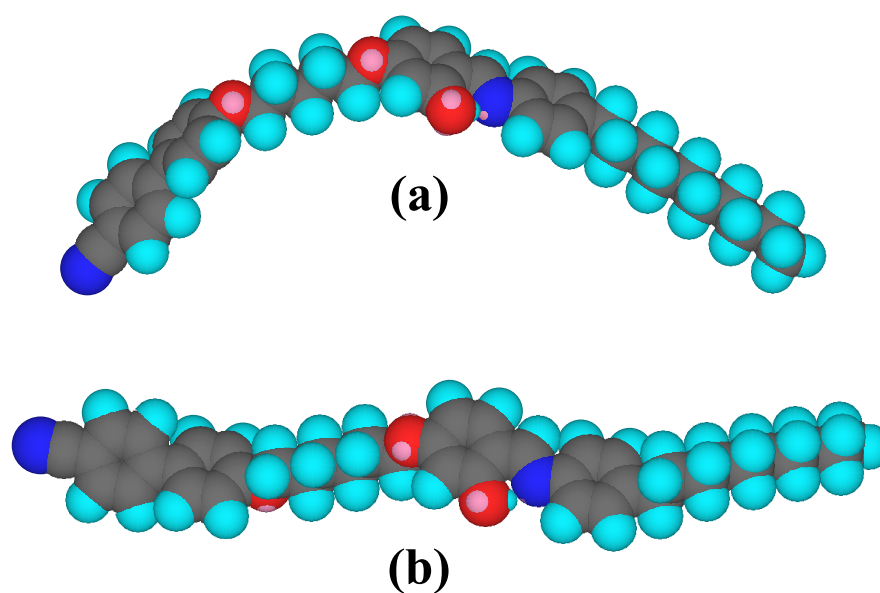

**Figure S3:** Space filling models of energy minimized molecular structures of dimeric ligands **DL-5** (a) and **DL-6** (b).
